# Supplementary material for: Blue-AsP monolayer as a promising anode material for lithium- and sodium-ion batteries: a DFT study
Source: Royal Society of Chemistry journal article supplement (doi:10.1039/d0cp05879c), 2021-01-01
Supplement: d0cp05879c1.pdf [file d0cp05879c1.pdf]

## Supporting Information

### Blue-AsP monolayer as a promising anode material for lithium- and sodium-ion batteries: a DFT study

Jing Zhang,<sup>a</sup> Yong-Fan Zhang,<sup>a</sup> Yi Li,<sup>a</sup> Yu-Rong Ren,<sup>b</sup>

Shu-Ping Huang<sup>\*a</sup>, Wei Lin<sup>\*a,c</sup> Wen-Kai Chen<sup>\*a,c,d</sup>

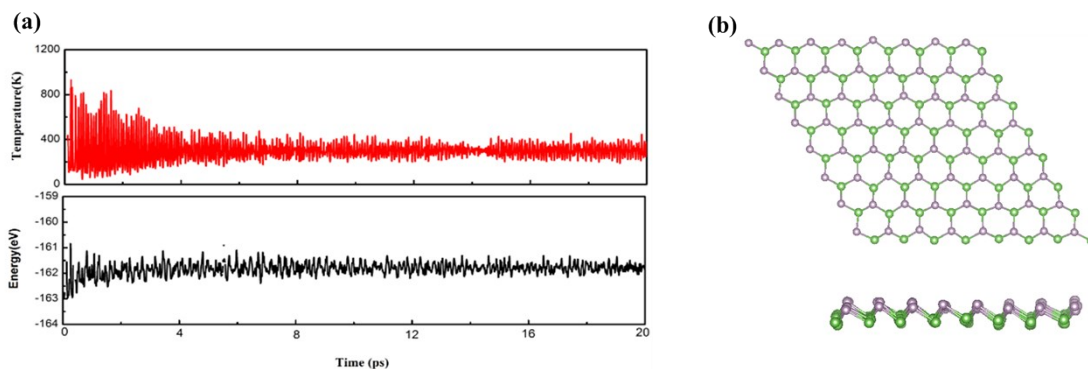

**Fig. S1** (a) Variations of temperature and energy in the AIMD simulations of *b*-AsP monolayer; (b) Top and side views of  $8 \times 8 \times 1$  supercells of the *b*-AsP monolayer after dynamics simulation at 300K.

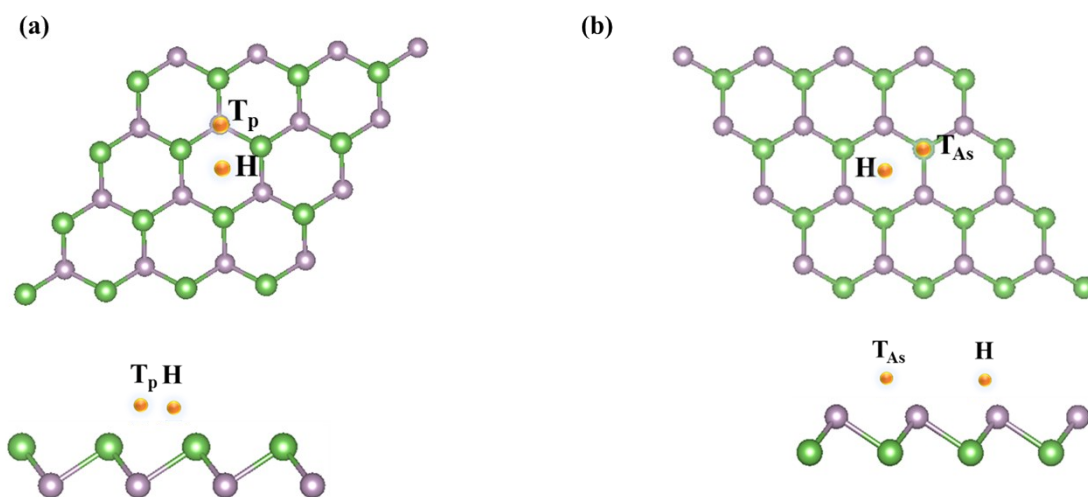

**Fig. S2** Top and side views of the table sites when Li/Na-ion is adsorbed (a) on the As side and (b) on the P side.

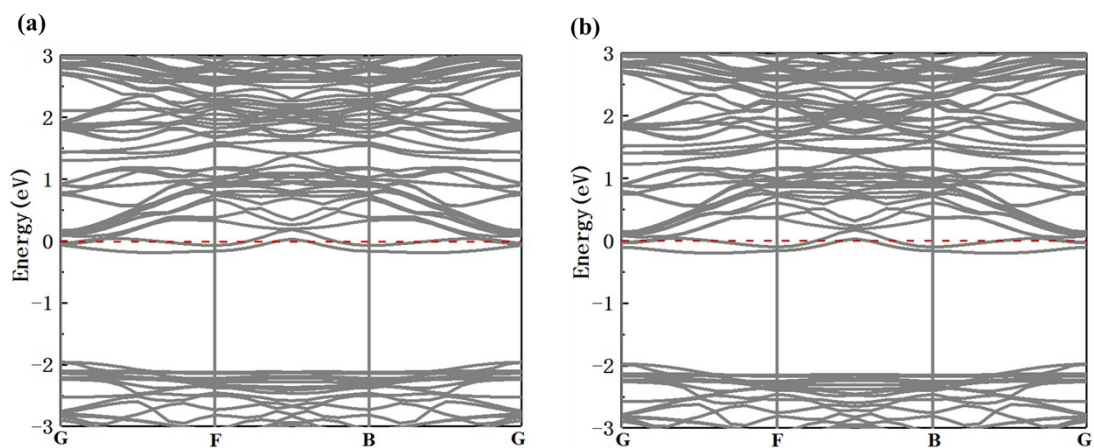

**Fig. S3** The electronic bands were calculated by using PBE functional of *b*-AsP monolayer adsorbing a (a) Li atom, (b) Na atom. The Fermi level is set to zero energy.

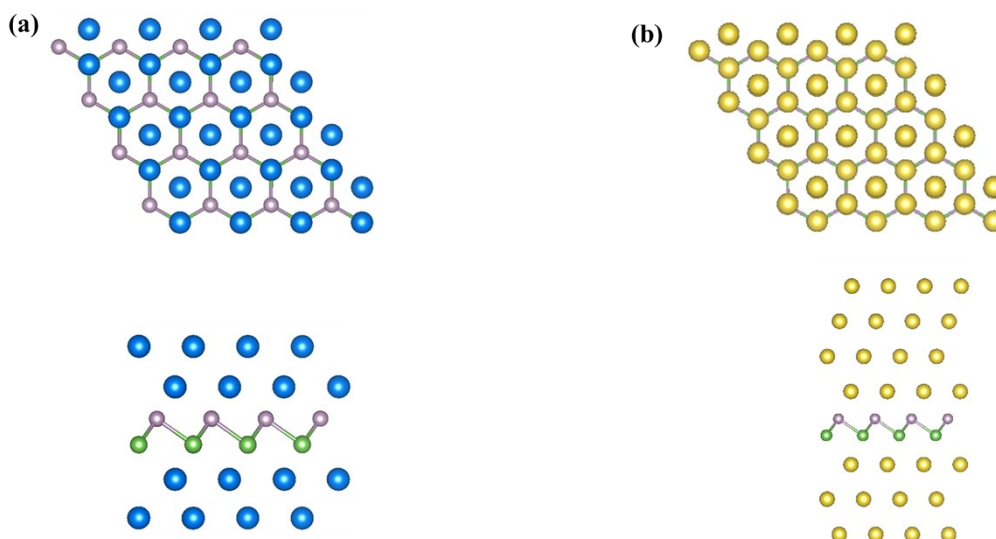

**Fig. S4** Top and side views of theoretical maximum Li storage in optimized (a)  $\text{Li}_4\text{AsP}$ , (b)  $\text{Na}_7\text{AsP}$

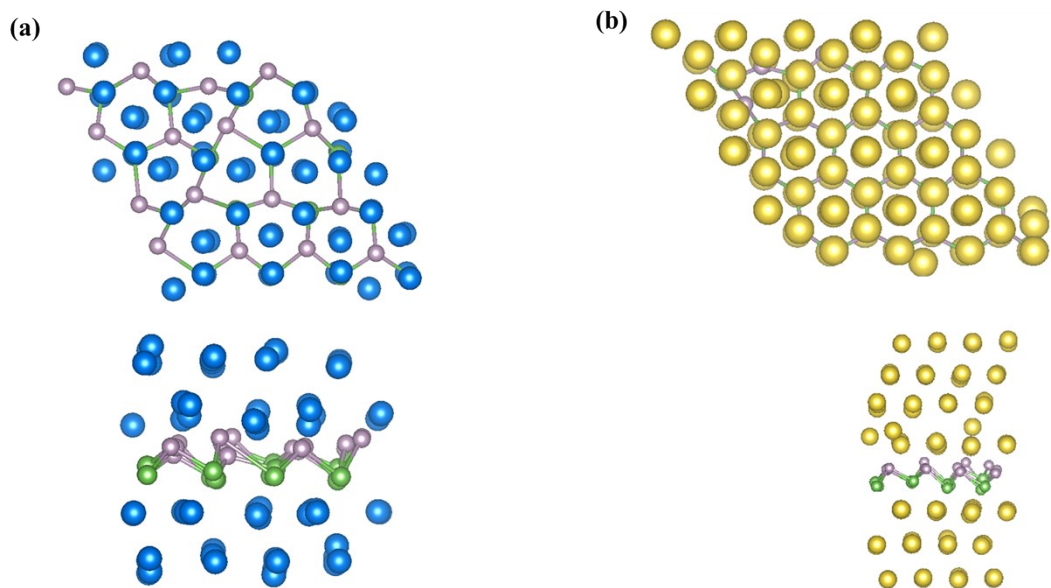

**Fig. S5** Top and side views of the last snapshots about Li/Na-saturated supercell models from the AIMD simulations at 300 K: (a) Li-AsP ( $\text{Li}_4\text{AsP}$ ); (b) Na-AsP ( $\text{Na}_7\text{AsP}$ ).
